# Supplementary material
Source: PubMed Central journal article supplement (PMC9477792)
Supplement: mmc4.pdf [file mmc4.pdf]

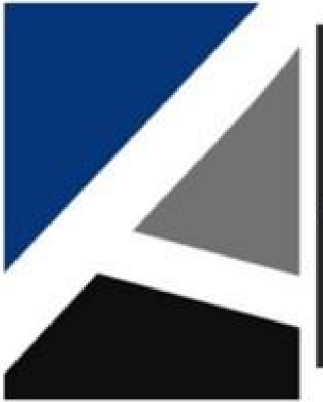

# PROOFREAD.MY

**KT0322557-U**

LOT 455 BLKG PASAR BEREK 12, JLN ABD KADIR ADABI,  
15200, KOTA BHARU, KELANTAN, MALAYSIA  
+60199961960

**Date: February 23, 2022**

**Ref no: PRED22-26**

To whom it may concern,

This document, “Does Baricitinib Reduce Mortality and Disease Progression in SARS-CoV-2 Virus Infected Patients? A Systematic Review and Meta Analysis”, has been edited by Joshua James Stuart of <http://proofread.my> as of February 23, 2022.

Regards,

Joshua James Stuart

Editor
